# Supplementary material
Source: PubMed Central journal article supplement (PMC7414608)
Supplement: tvst-9-7-20_s001.pdf [file tvst-9-7-20_s001.pdf]

+

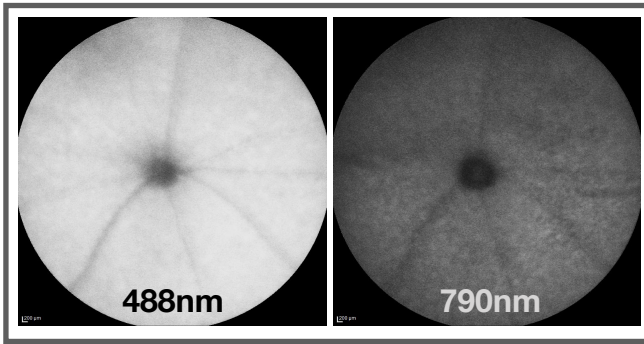

Dual vector  
2E+10

++

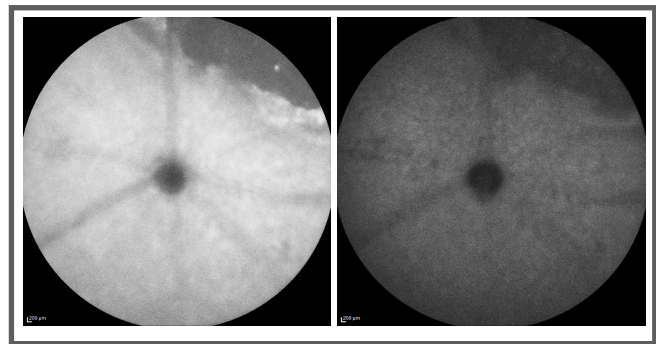

5' vector  
2E+10

+++

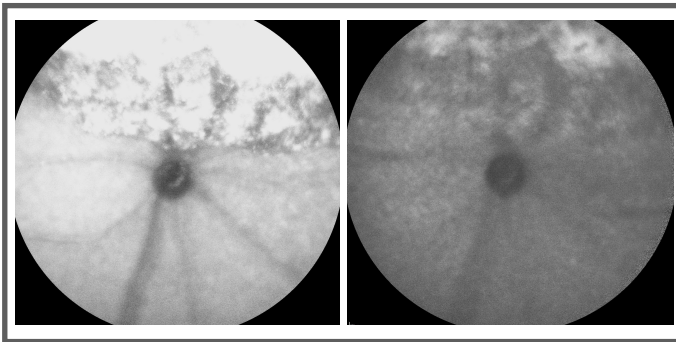

3' vector  
1E+10

++++

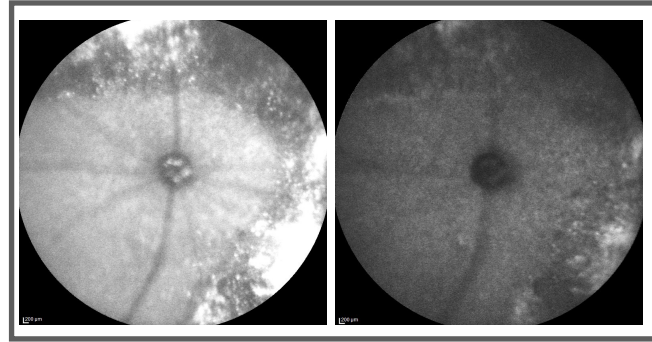

Sham

Supplementary Figure 1. Example scanning laser ophthalmoscope (SLO) images showing the degree of damage used to score mice for the data collated in Table 2.
