# Supplementary material
Source: PubMed Central journal article supplement (PMC7414608)
Supplement: tvst-9-7-20_s002.pdf [file tvst-9-7-20_s002.pdf]

**A**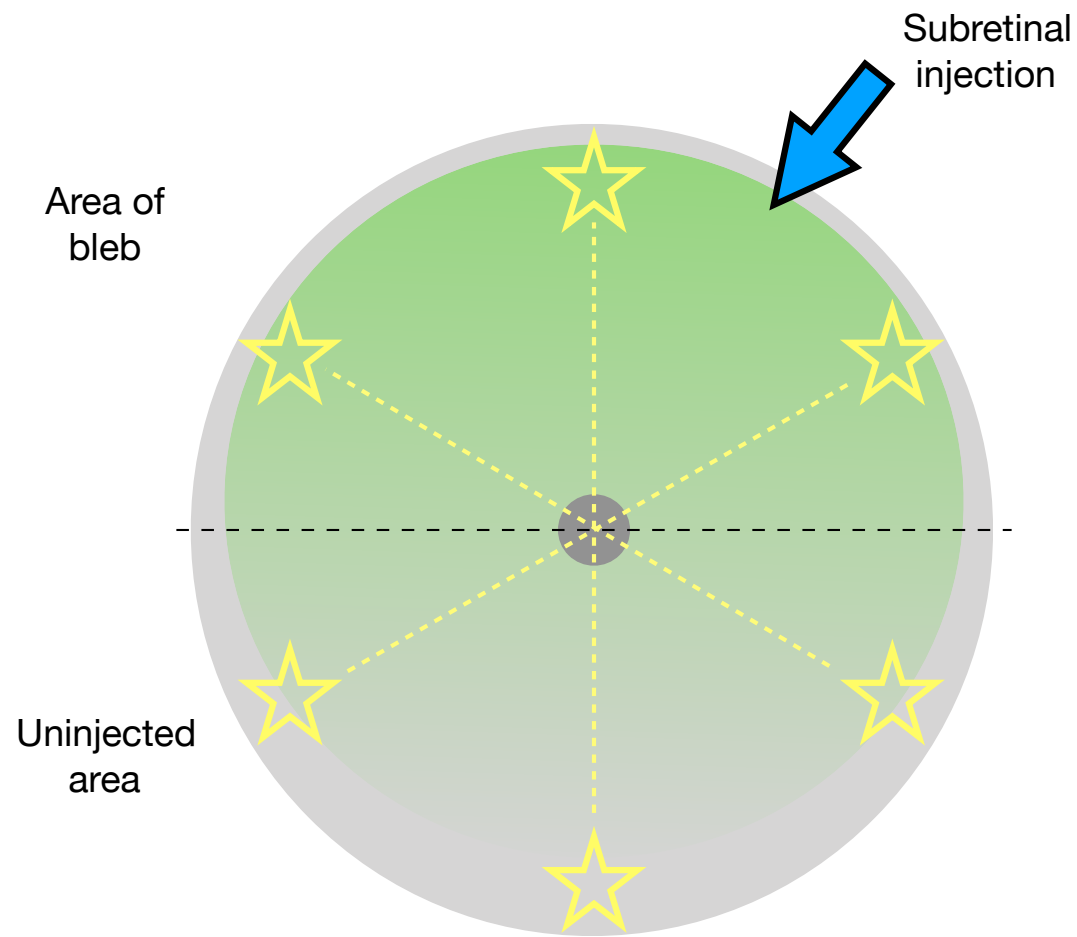**B**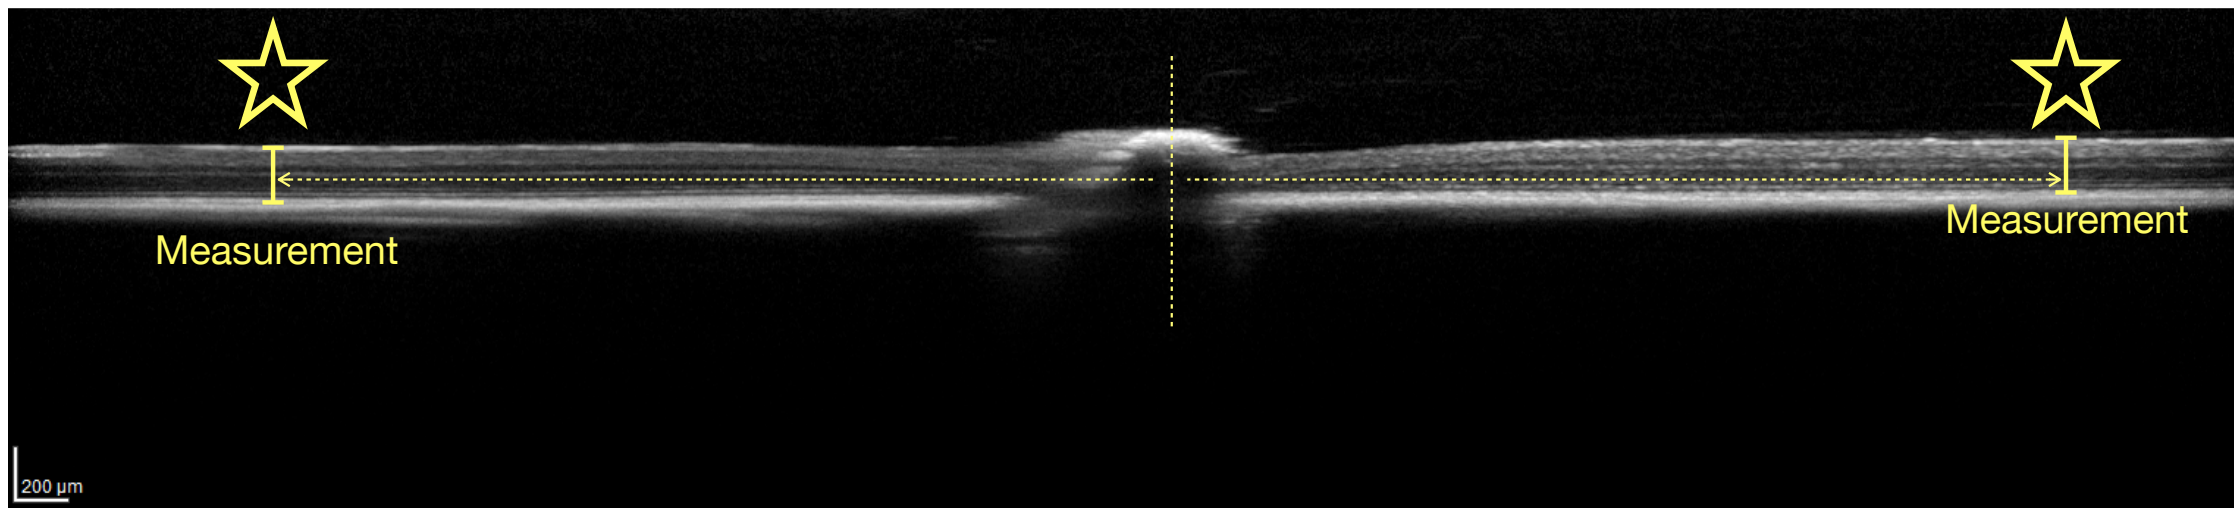

Supplementary Figure 2. For standardized retinal thickness measurements by optical coherence tomography (OCT), radial scans were performed and six defined areas were selected for measurement extraction for each eye. The thickness measurements at three locations were averaged for retinal thickness measurements at the area of injection and uninjected area.
