# Supplementary material
Source: PubMed Central journal article supplement (PMC7414608)
Supplement: tvst-9-7-20_s005.pdf [file tvst-9-7-20_s005.pdf]

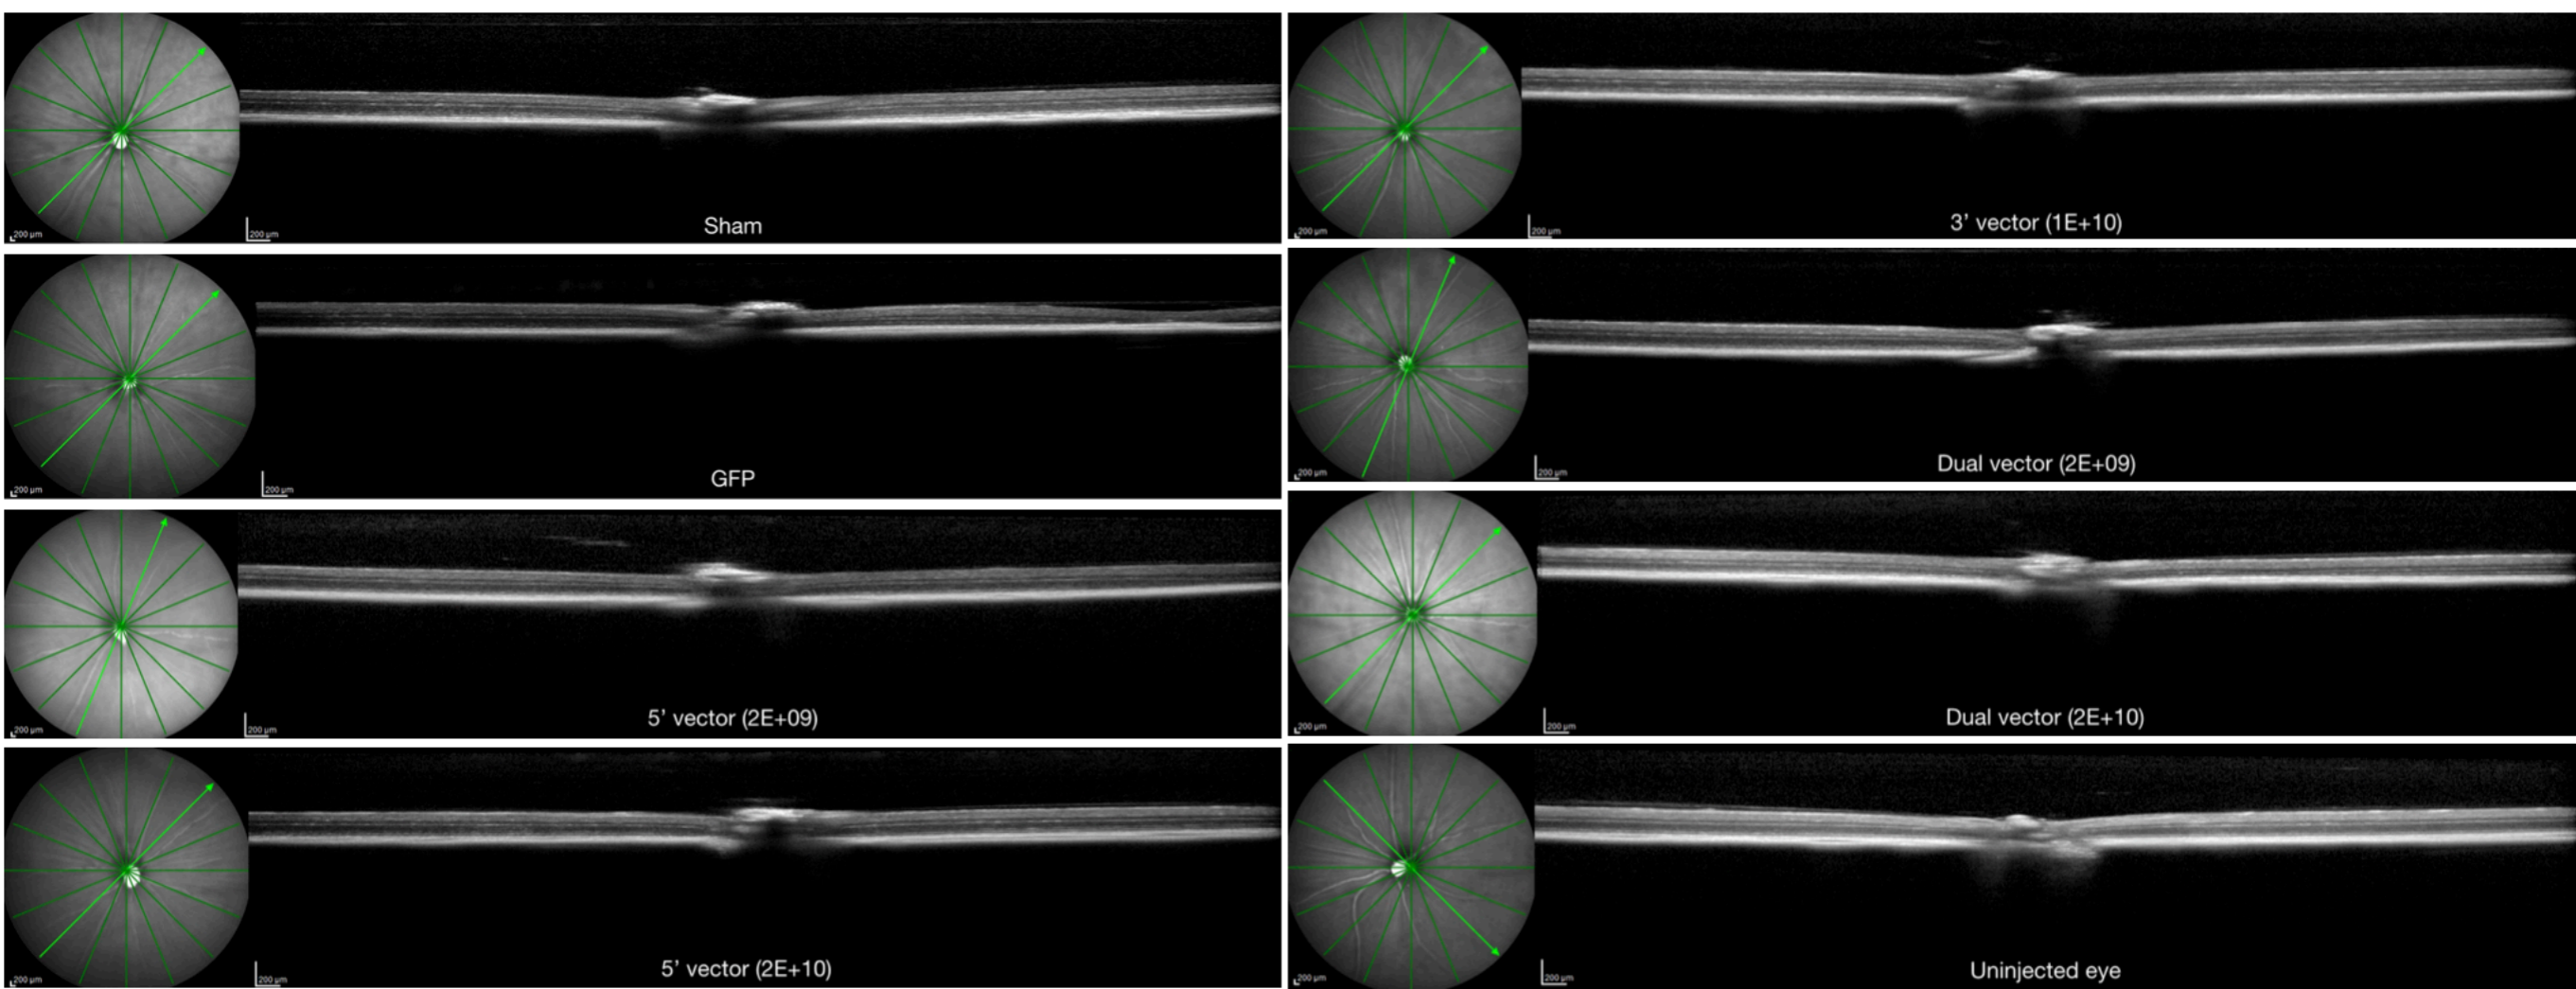

Supplementary Figure 5. Example OCT scans of injected eyes taken 6 months post-injection through the region of injection for each cohort.
