# Supplementary material
Source: PubMed Central journal article supplement (PMC7414608)
Supplement: tvst-9-7-20_s006.pdf [file tvst-9-7-20_s006.pdf]

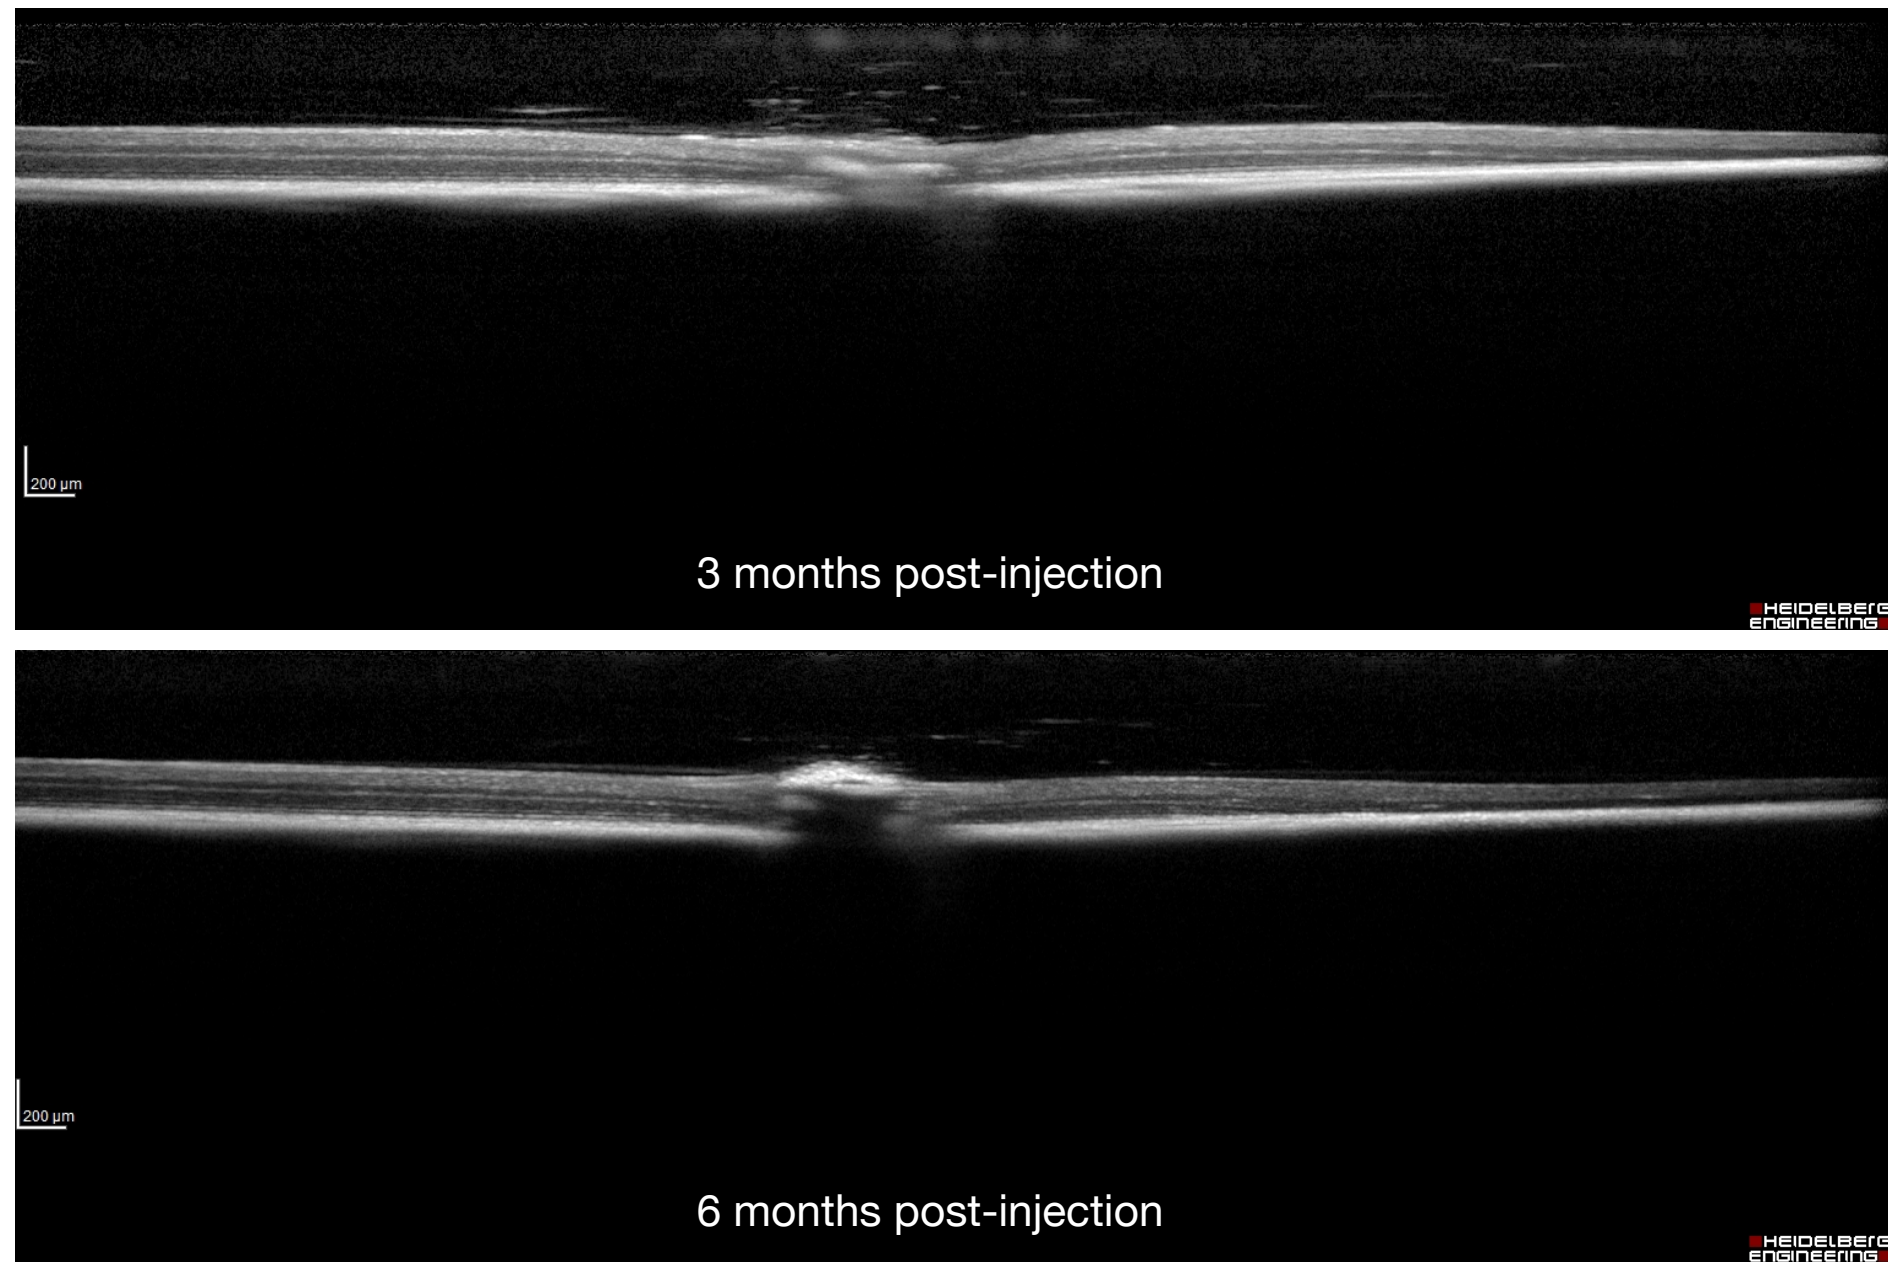

Supplementary Figure 6. Comparisons of retinal sections of an eye injected with 5' vector  $2E+10$  showing cells in the vitreous at 3 months post-injection that were less apparent at 6 month post-injection.
