# Supplementary material
Source: PubMed Central journal article supplement (PMC7414608)
Supplement: tvst-9-7-20_s007.pdf [file tvst-9-7-20_s007.pdf]

**A**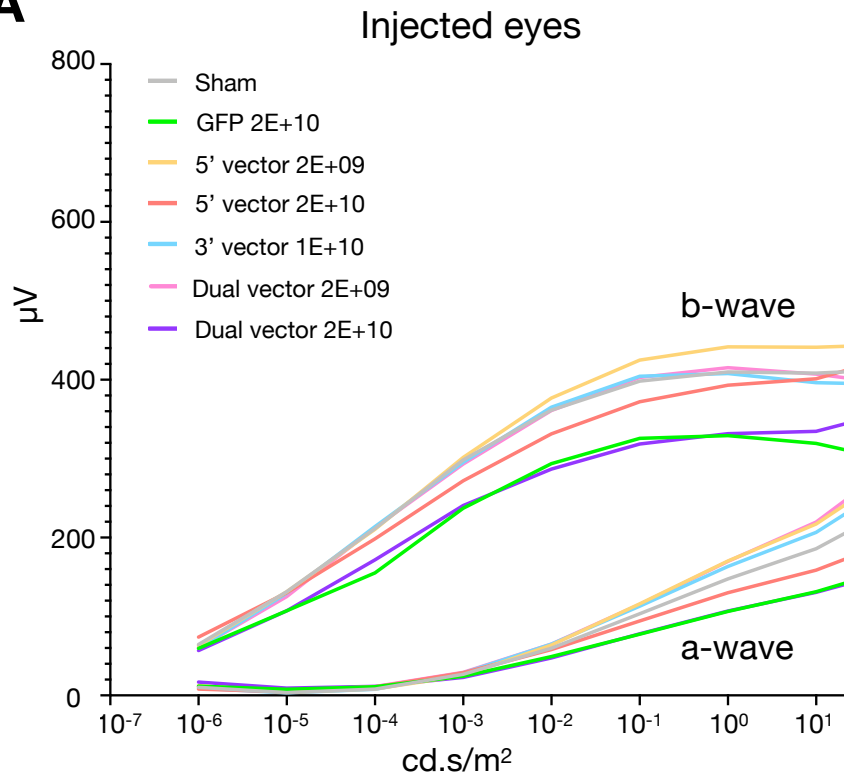**B**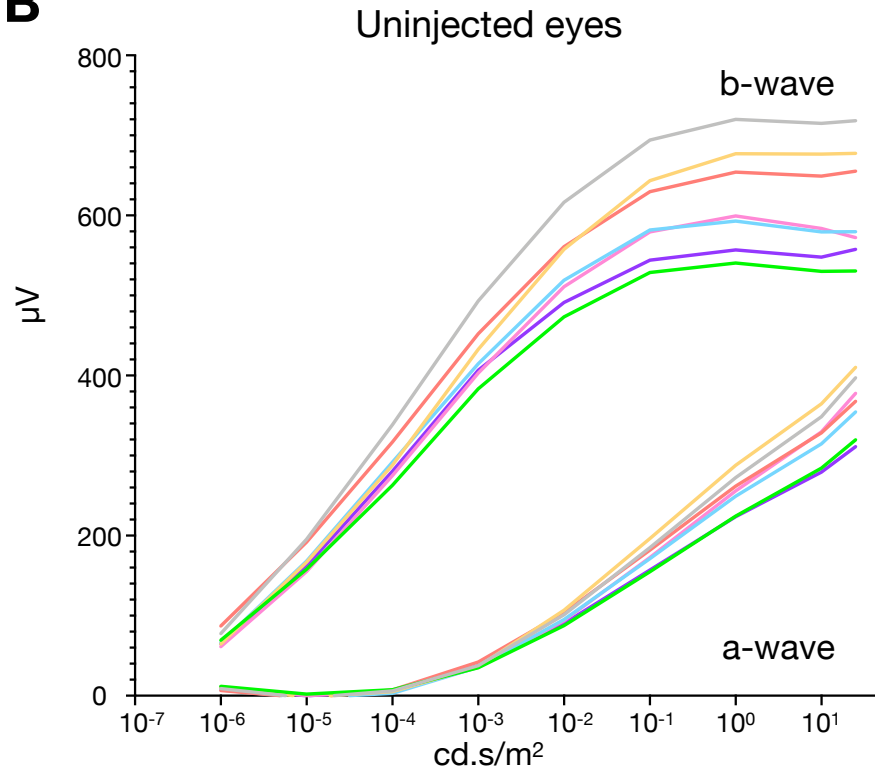

Supplementary Figure 7. Electretinogram (ERG) response data 3 months post-injection. Smoothed average scotopic a- and b-wave response curves are shown for injected (A) and uninjected (B) eyes for all cohorts.
