# Supplementary material
Source: PubMed Central journal article supplement (PMC7414608)
Supplement: tvst-9-7-20_s009.pdf [file tvst-9-7-20_s009.pdf]

Supplementary Table 1. Scotopic electroretinography protocol.

| Step | Trials | Inter sweep delay | Sweep length | Delay to next step | Description    | cd.s/m <sup>2</sup> |
|------|--------|-------------------|--------------|--------------------|----------------|---------------------|
| 1    | 16     | 0                 | 3,000        | 48,000             | Single 0.5Hz   | 1E-06               |
| 2    | 16     | 0                 | 3,000        | 48,000             | Single 0.5Hz   | 1E-05               |
| 3    | 9      | 1,000             | 3,000        | 35,000             | Single 0.5Hz   | 0.0001              |
| 4    | 9      | 1,000             | 3,000        | 35,000             | Single 0.5Hz   | 0.001               |
| 5    | 9      | 5,000             | 3,000        | 67,000             | Single 0.5Hz   | 0.01                |
| 6    | 4      | 13,000            | 3,000        | 51,000             | Single 0.5Hz   | 0.1                 |
| 7    | 4      | 29,000            | 3,000        | 99,000             | Single 0.5Hz   | 1                   |
| 8    | 4      | 61,000            | 3,000        | 195,000            | Single 0.5Hz   | 10                  |
| 9    | 1      | 0                 | 3,000        | 3,000              | Single 0.5Hz   | 25                  |
| 10   | 25     | 0                 | 500          | 12,500             | Continuous 6Hz | 0.01                |
| 11   | 25     | 0                 | 500          | 12,500             | Continuous 6Hz | 0.1                 |
| 12   | 25     | 0                 | 500          | 12,500             | Continuous 6Hz | 1                   |
| 13   | 25     | 0                 | 500          | 12,500             | Continuous 6Hz | 3                   |
| 14   | 25     | 0                 | 500          | 12,500             | Continuous 6Hz | 10                  |
| 15   | 25     | 0                 | 500          | 12,500             | Continuous 6Hz | 10                  |
| 16   | 25     | 0                 | 500          | 12,500             | Continuous 6Hz | 10                  |
