# Supplementary material
Source: PubMed Central journal article supplement (PMC7414608)
Supplement: tvst-9-7-20_s010.pdf [file tvst-9-7-20_s010.pdf]

Supplementary Table 2. Photopic electroretinography protocol.

| <b>Step</b> | <b>Trials</b> | <b>Inter sweep delay</b> | <b>Sweep length</b> | <b>Delay to next step</b> | <b>Description</b> | <b>cd.s/m<sup>2</sup></b> |
|-------------|---------------|--------------------------|---------------------|---------------------------|--------------------|---------------------------|
| 1           | 25            | 0                        | 500                 | 12,500                    | Single 0.5Hz       | 0.3                       |
| 2           | 25            | 0                        | 500                 | 12,500                    | Single 0.5Hz       | 1                         |
| 3           | 25            | 0                        | 500                 | 12,500                    | Single 0.5Hz       | 3                         |
| 4           | 25            | 0                        | 500                 | 12,500                    | Single 0.5Hz       | 10                        |
| 5           | 25            | 0                        | 500                 | 12,500                    | Single 0.5Hz       | 25                        |
| 6           | 25            | 0                        | 500                 | 12,500                    | Continuous 20Hz    | 10                        |
| 7           | 25            | 0                        | 500                 | 12,500                    | Continuous 30Hz    | 10                        |
