# Supplementary material
Source: PubMed Central journal article supplement (PMC7414608)
Supplement: tvst-9-7-20_s011.pdf [file tvst-9-7-20_s011.pdf]

Supplementary Table 3. Correlation data for percentage of maintained outer segment thickness and percentage of maintained total retinal thickness in the area of injection at 6 months (data plot shown in Supplementary Figure 4D).

|          | <b>Sham</b> | <b>GFP</b><br><b>2E+10</b> | <b>5' vector</b><br><b>2E+09</b> | <b>5' vector</b><br><b>2E+10</b> | <b>3' vector</b><br><b>1E+10</b> | <b>Dual</b><br><b>2E+09</b> | <b>Dual</b><br><b>2E+10</b> |
|----------|-------------|----------------------------|----------------------------------|----------------------------------|----------------------------------|-----------------------------|-----------------------------|
| <b>r</b> | 0.9665      | 0.8948                     | 0.9549                           | 0.8720                           | 0.9887                           | 0.9606                      | 0.9459                      |
| <b>P</b> | <0.0001     | 0.0027                     | 0.0114                           | 0.0235                           | 0.0014                           | 0.0093                      | 0.0013                      |
